# Supplementary material for: Poly(acrylonitrile)/activated carbon composite polymer gel electrolyte for high efficiency dye sensitized solar cells
Source: Royal Society of Chemistry journal article supplement (doi:10.1039/c3ta10392g), 2013-01-01

### Supplementary materials

**Figure S1.** SEM images of (a) PAN/ Ac. carbon and (b) PAN/SiO<sub>2</sub> polymer gel electrolyte dried films.

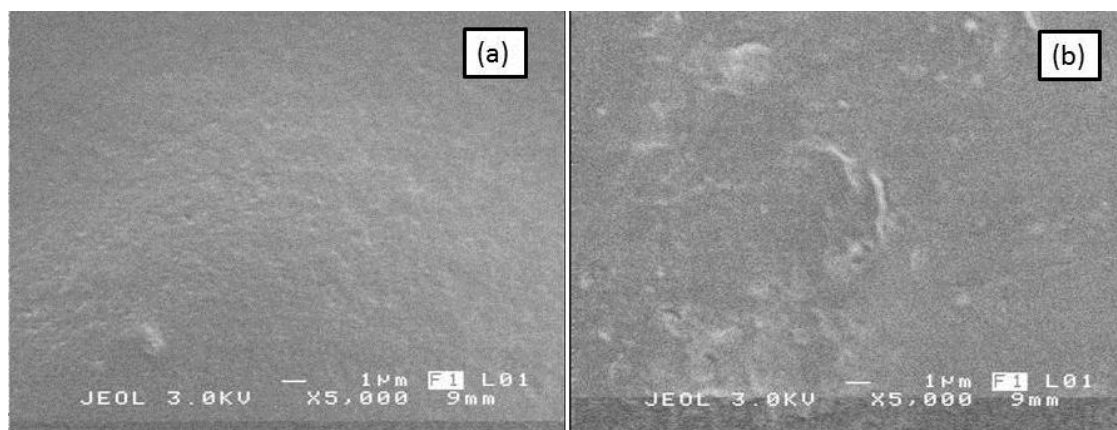

**Figure S2.** CV curve only for gel electrolyte with the configuration of Pt/Gel electrolyte /Pt.

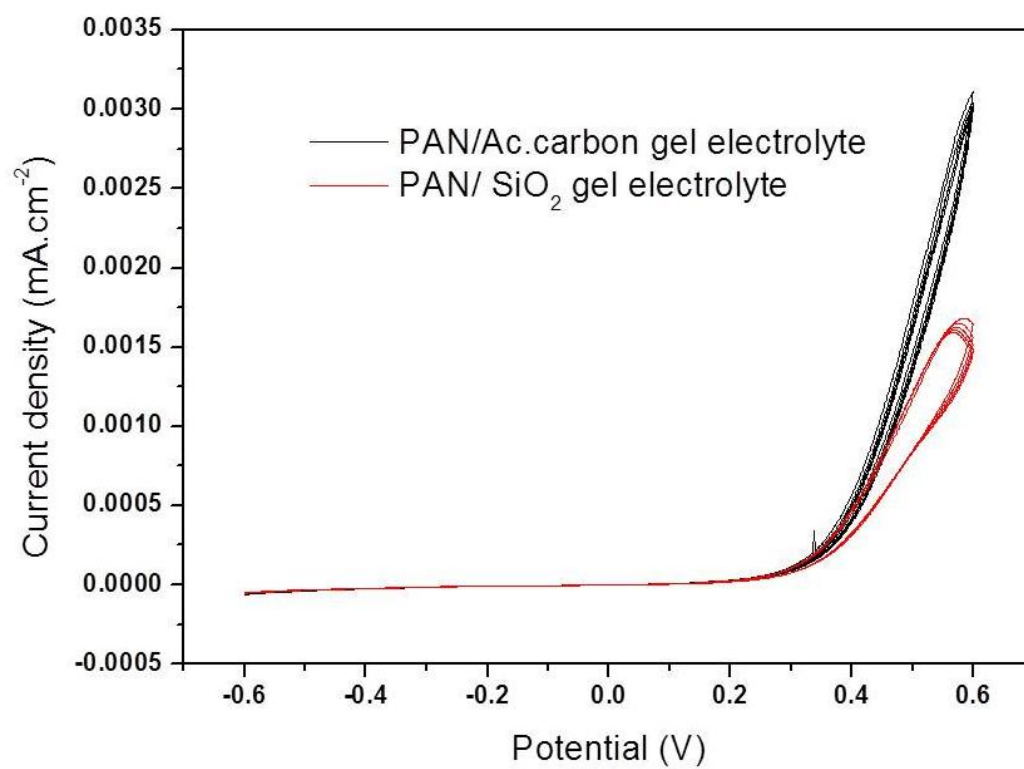

**Figure S3.** Nyquist plots of PAN/ Ac.carbon and PAN/SiO<sub>2</sub> polymer gel electrolytes.

Inset plot shows electrolyte to electrode interface contact resistance.

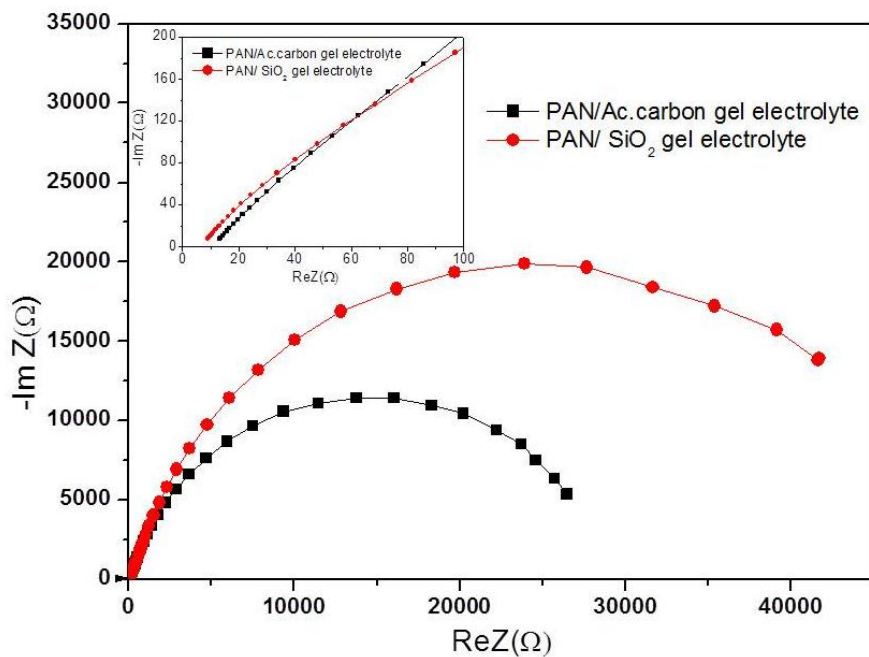

**Figure S4.** Determination of electronic current for PAN/ Ac.carbon and PAN/SiO<sub>2</sub> polymer gel electrolytes by Wagner's polarisation technique.

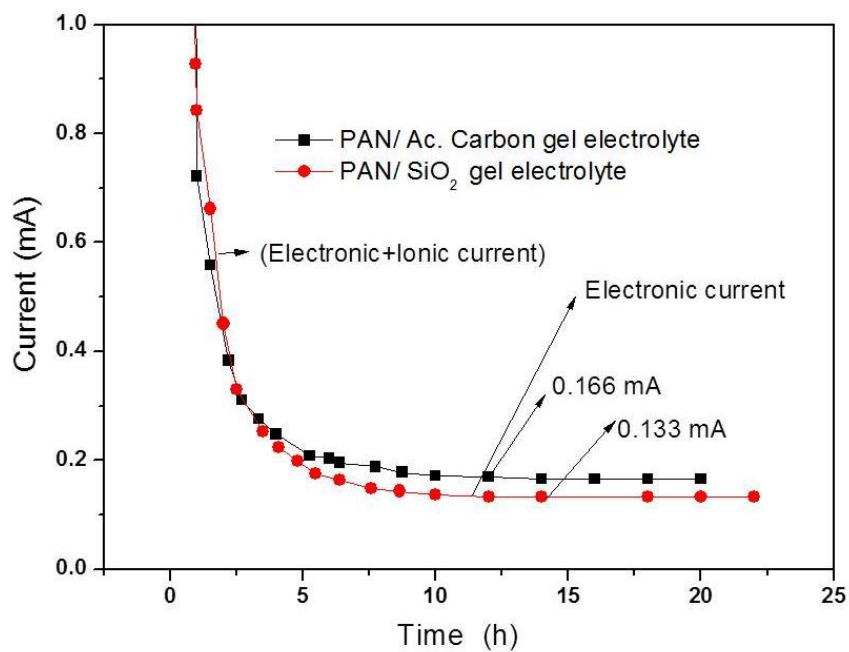

Supplement: c3ta10392g.pdf [file c3ta10392g.pdf]
